# Supplementary material for: FeMoS2 micoroparticles as an excellent catalyst for the activation of peroxymonosulfate toward organic contaminant degradation
Source: Royal Society of Chemistry journal article supplement (doi:10.1039/d3ra00707c), 2023-01-01
Supplement: d3ra00707c1.pdf [file d3ra00707c1.pdf]

## Support Materials

### **FeMoS<sub>2</sub> Microparticles as an Excellent Catalyst for the Activation of Peroxymonosulfate toward Organic Contaminant Degradation**

Cai-Wu Luo, <sup>a, b, \*</sup> Lei Cai, <sup>b</sup> Chao Xie, <sup>b</sup> Jing Wu, <sup>c</sup> Tian-Jiao Jiang

<sup>b</sup>

<sup>a</sup> Research Center for Eco-Environmental Sciences, Chinese Academy of Sciences, 100085, China

<sup>b</sup> School of Resource Environmental and Safety Engineering, University of South China, 421000, China

<sup>c</sup> Ningxia Modern Construction Technology Vocational Skills Public Training Center, Ningxia College of Construction, 750021, China

\* Corresponding author: Cai-Wu Luo;

Tel: +86-734-8282345;

E-mail address: [luocaiwu00@126.com](mailto:luocaiwu00@126.com).

**Figure S1**

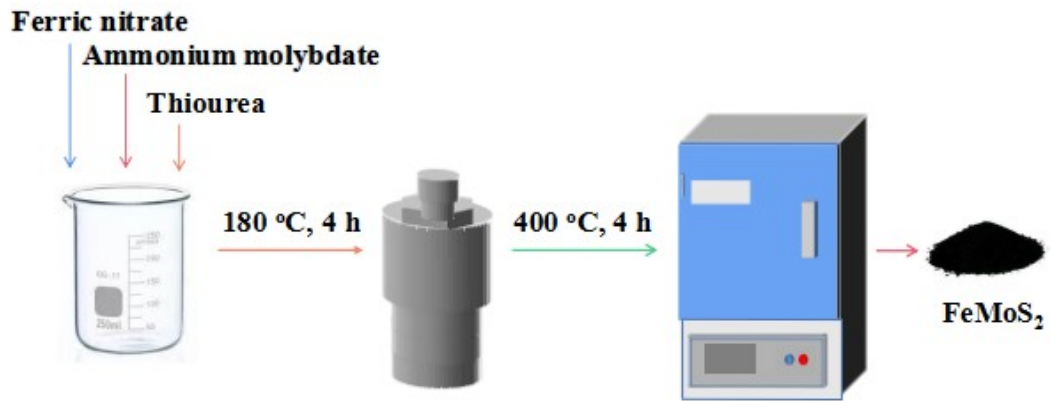

**Figure S1** Synthetic route of FeMoS<sub>2</sub> microparticles.

**Figure S2**

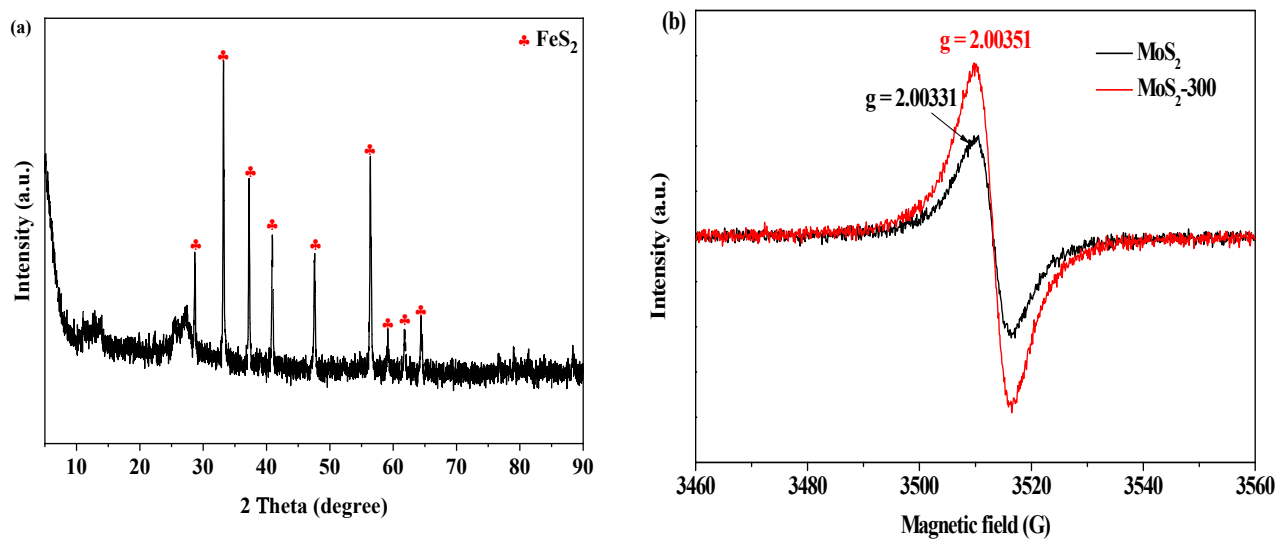

**Figure S2** (a) XRD pattern of Fe-S catalyst; (b) EPR signal of sulfur vacancies in  $\text{MoS}_2$  and  $\text{MoS}_2$ -300.

**Figure S3**

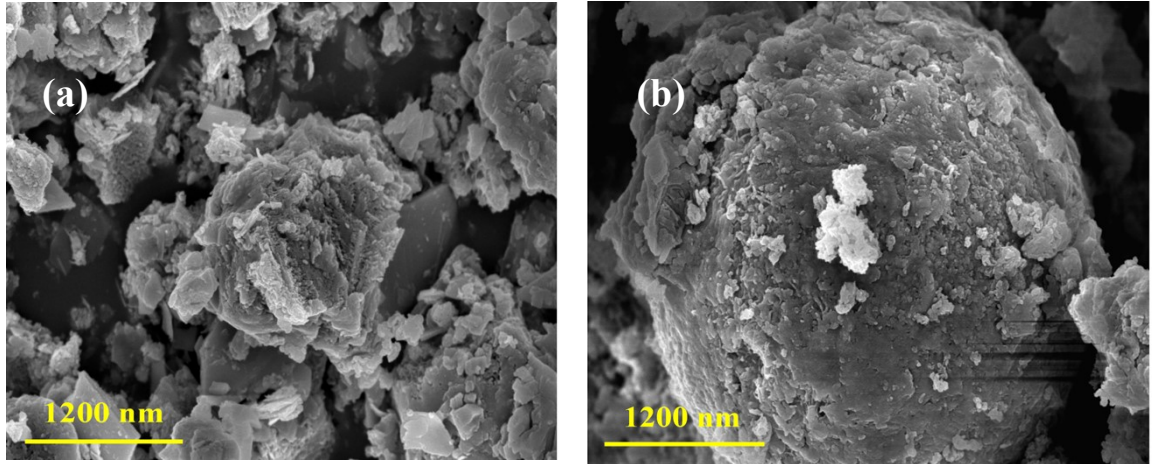

**Figure S3** (a) SEM image of MoS<sub>2</sub>-IS; (b) SEM image of FeMoS<sub>2</sub>-IS.

**Figure S4**

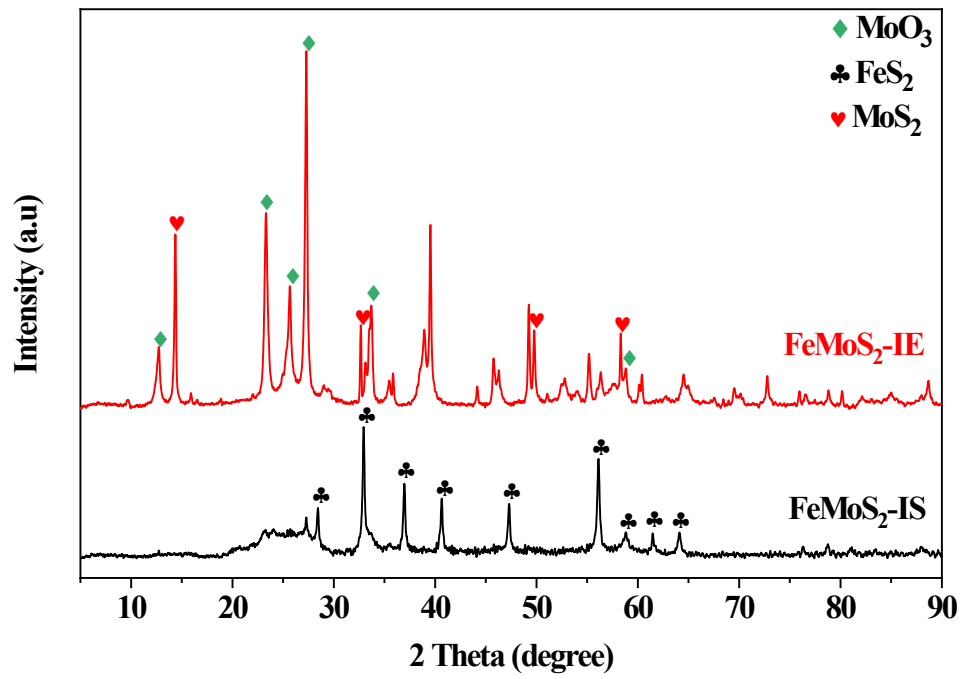

**Figure S4** XRD patterns of FeMoS<sub>2</sub>-IS and FeMoS<sub>2</sub>-IE.

**Figure S5**

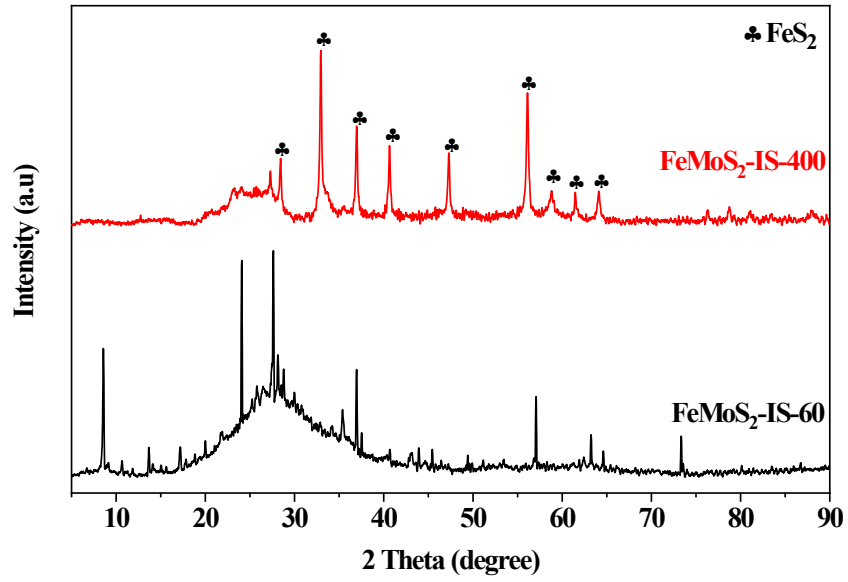

**Figure S5** XRD patterns of FeMoS<sub>2</sub>-IS-60 and FeMoS<sub>2</sub>-IS-400.

Figure S6

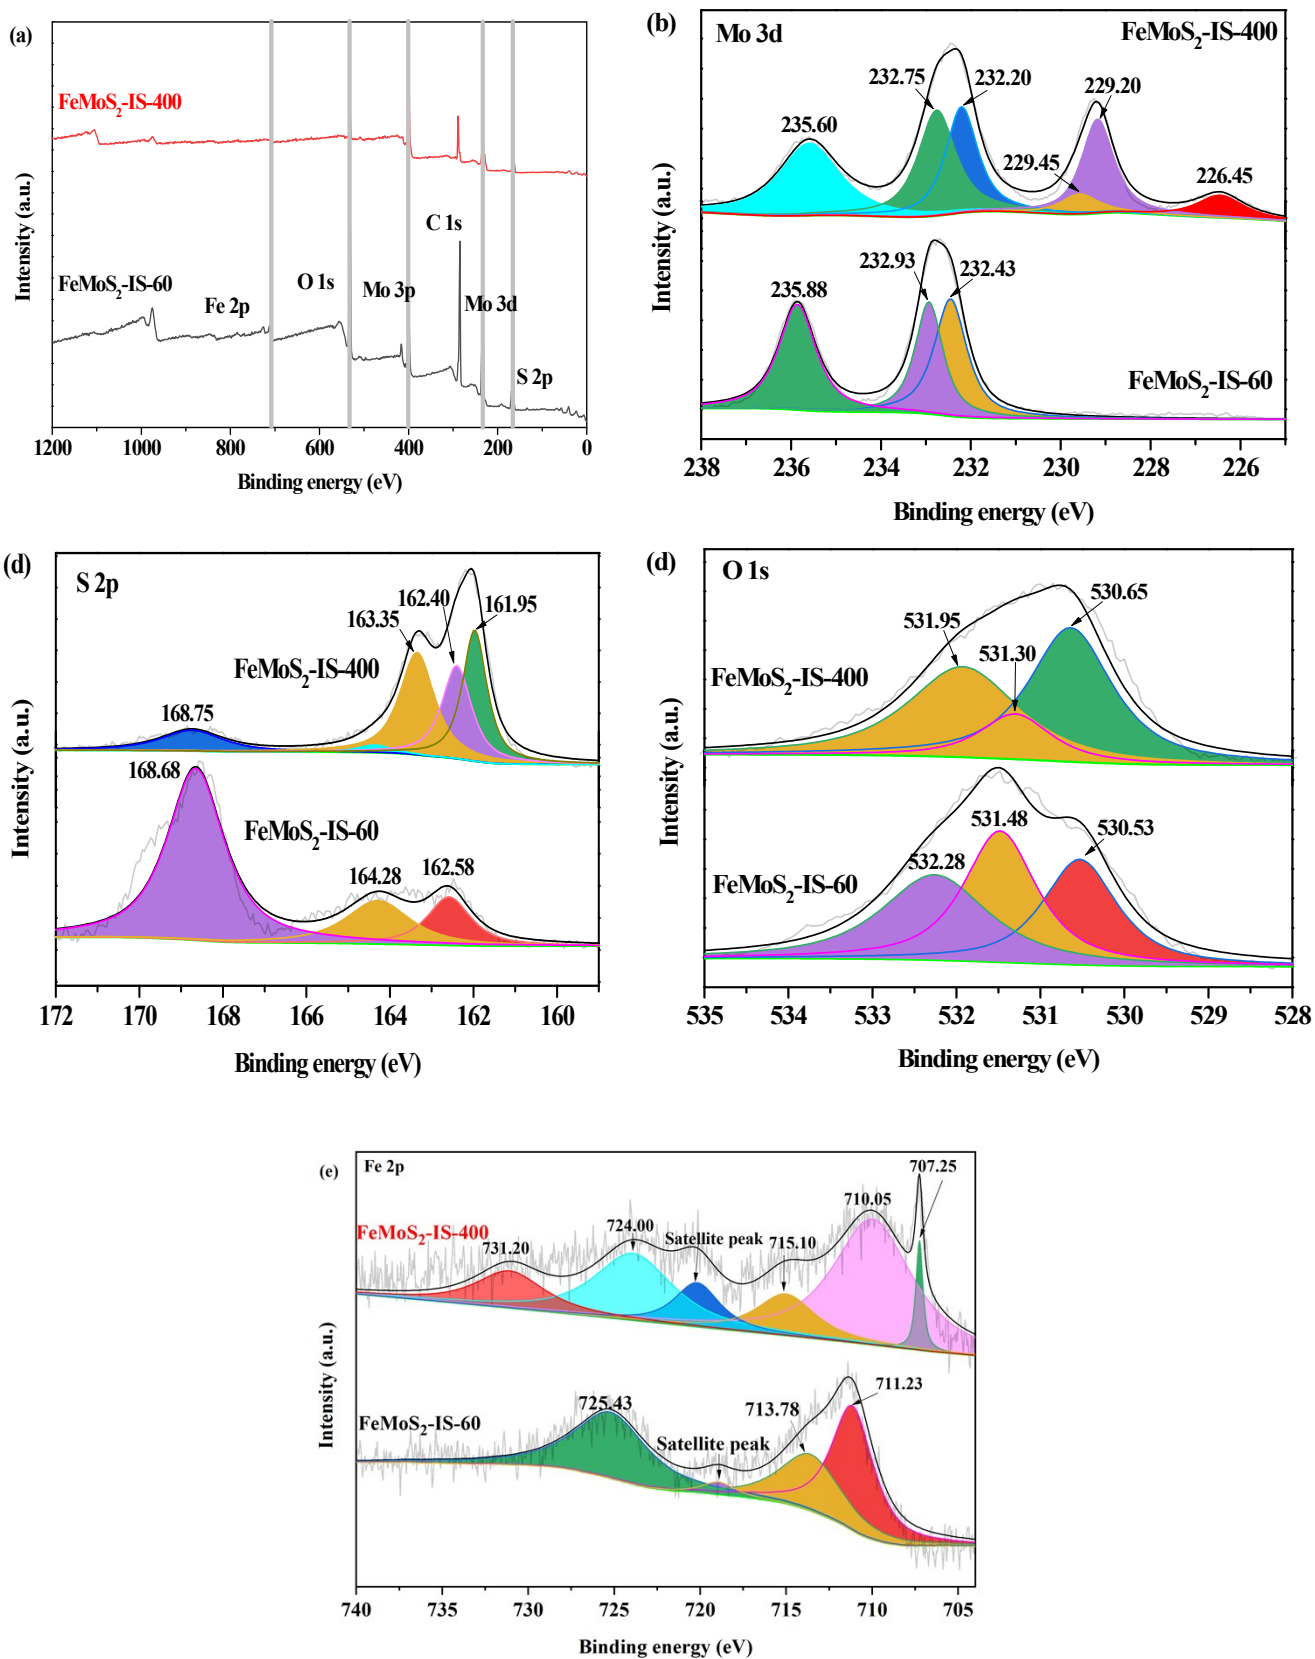

Figure S6 XPS spectra of (a) survey spectra, (b) Mo 3d, (c) S 2p, (d) O 1s and (e) Fe 2p in the FeMoS<sub>2</sub>-IS-60 and FeMoS<sub>2</sub>-IS-400.

**Figure S7**

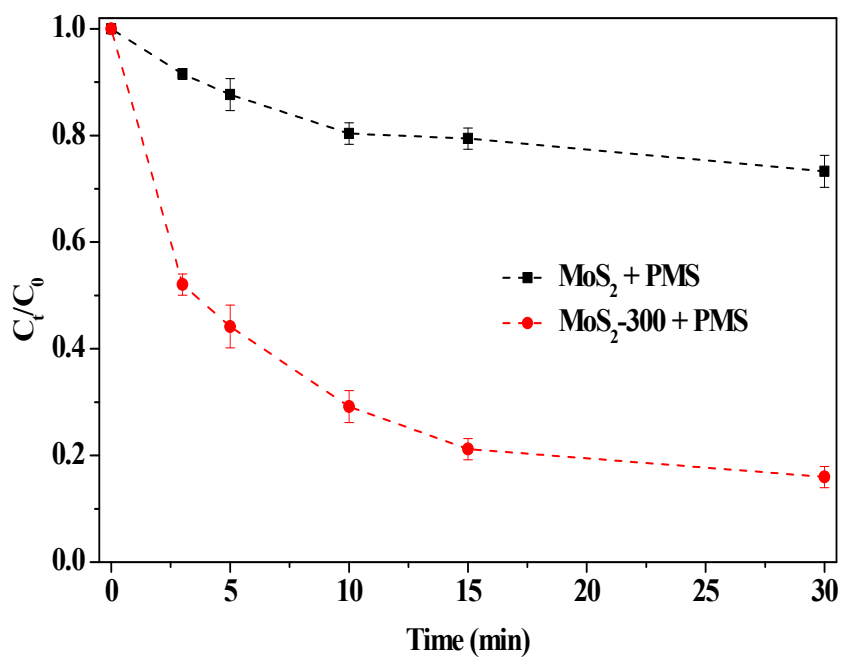

**Figure S7** Removal of RhB over  $\text{MoS}_2$  and  $\text{MoS}_2\text{-300}$  activating PMS. Reaction conditions:  $[\text{RhB}] = 10 \text{ mg/L}$ , initial  $\text{pH} = 3.0$ ,  $[\text{MoS}_2 \text{ and } \text{MoS}_2\text{-300}] = 1.0 \text{ g/L}$ ,  $[\text{PMS}] = 1.0 \text{ mM}$  and in the darkness.



**Figure S8**

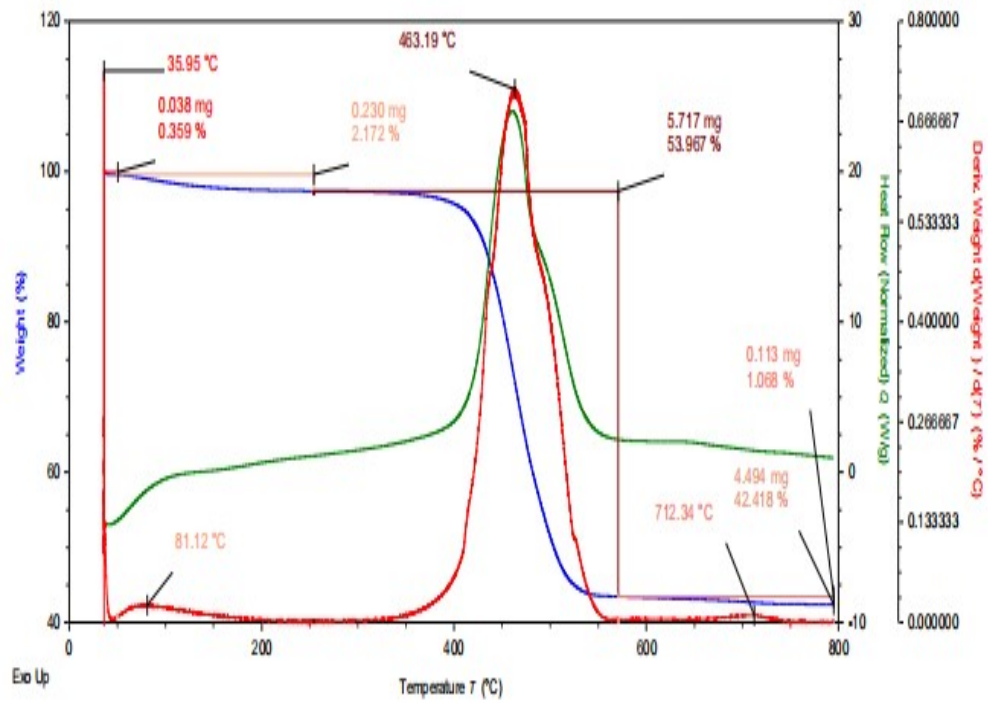

**Figure S8 TG-DSC of FeMoS<sub>2</sub>-IS.**

**Figure S9**

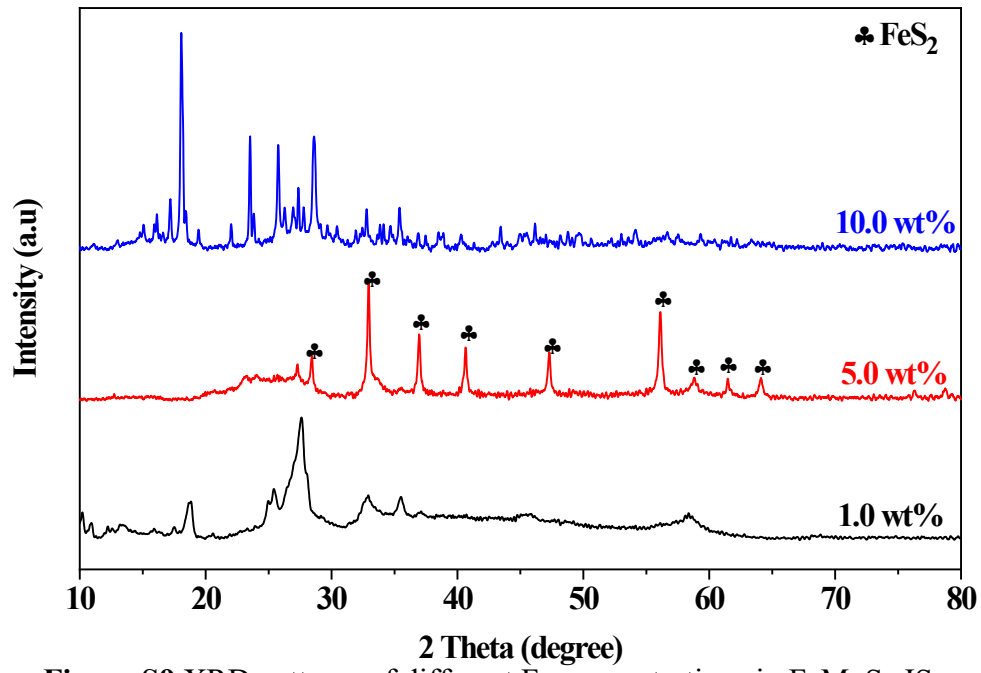

**Figure S9** XRD patterns of different Fe concentrations in FeMoS<sub>2</sub>-IS.

**Figure S10**

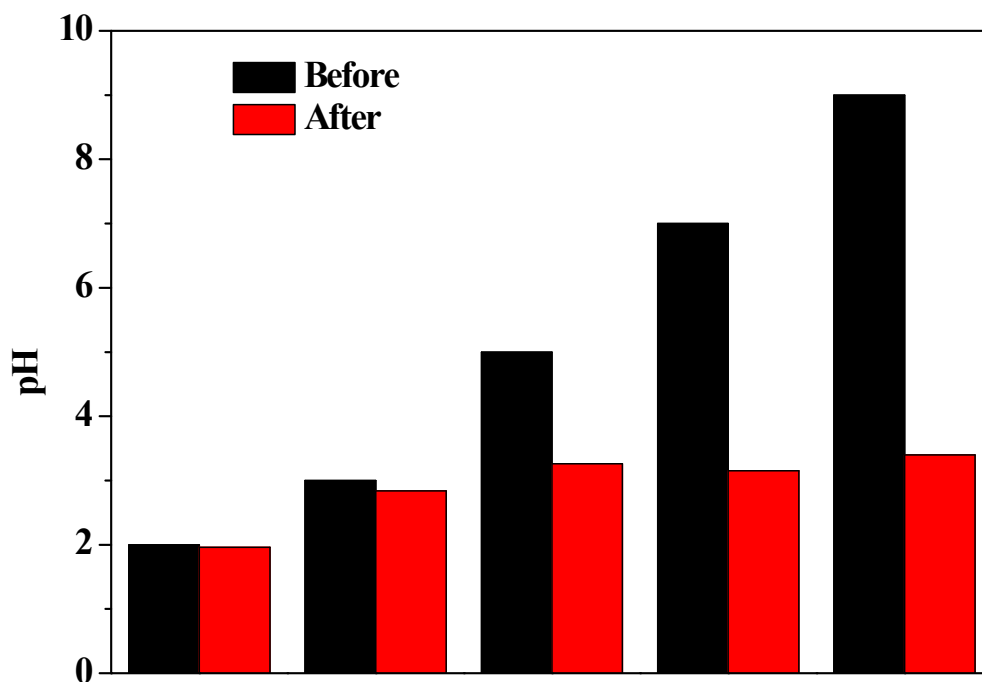

**Figure S10** Change of solution pH before and after the reaction. Reaction conditions: [RhB] = 10 mg/L, [FeMoS<sub>2</sub>-IS] = 1.0 g/L, [PMS] = 1.0 mM and in the darkness.

**Figure S11**

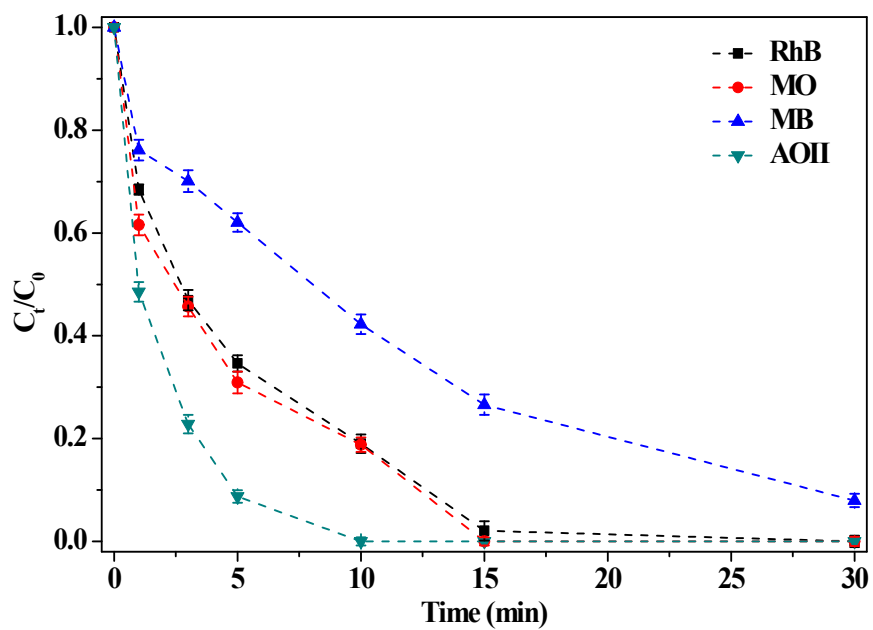

**Figure S11** Removal of different organic pollutants. Reaction conditions: [Organic pollutants] = 20.8  $\mu$ M, initial pH = 3.0, [FeMoS<sub>2</sub>-IS] = 0.3 g/L, [PMS] = 1.0 mM and in the darkness.

Figure S12

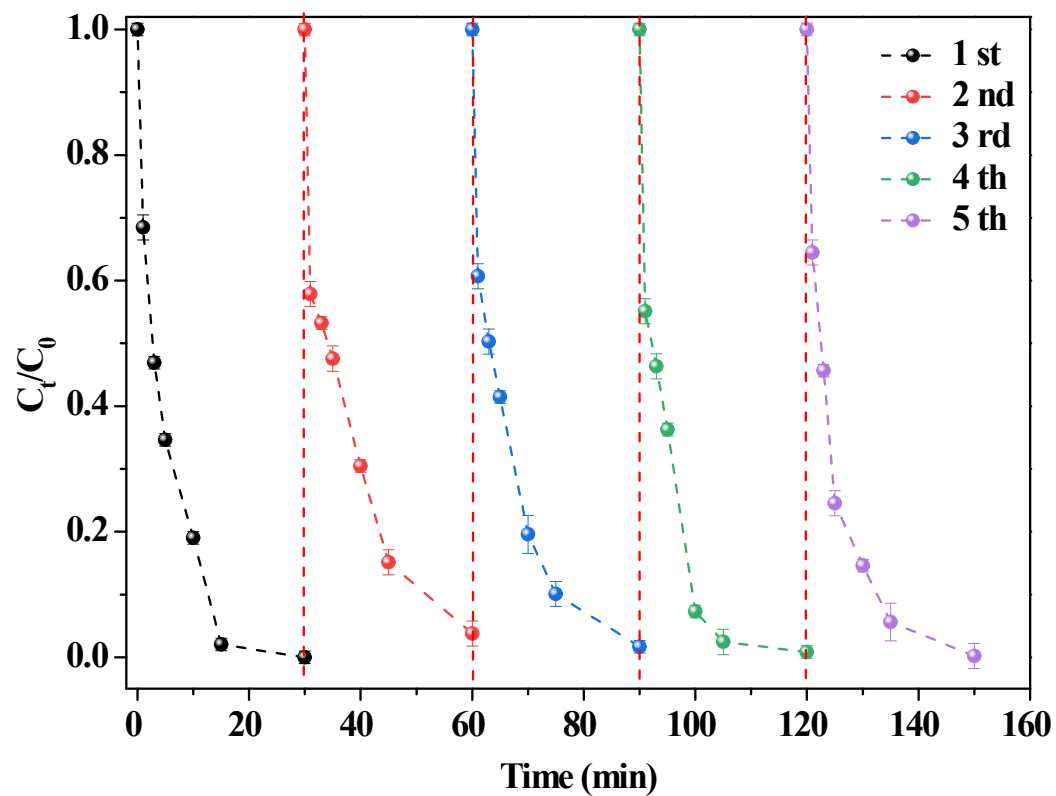

Figure S12 The stability of catalyst. Reaction conditions: [RhB] = 10 mg/L, initial pH = 3.0, [FeMoS<sub>2</sub>-IS] = 0.3 g/L, [PMS] = 1.0 mM and in the darkness.

**Figure S13**

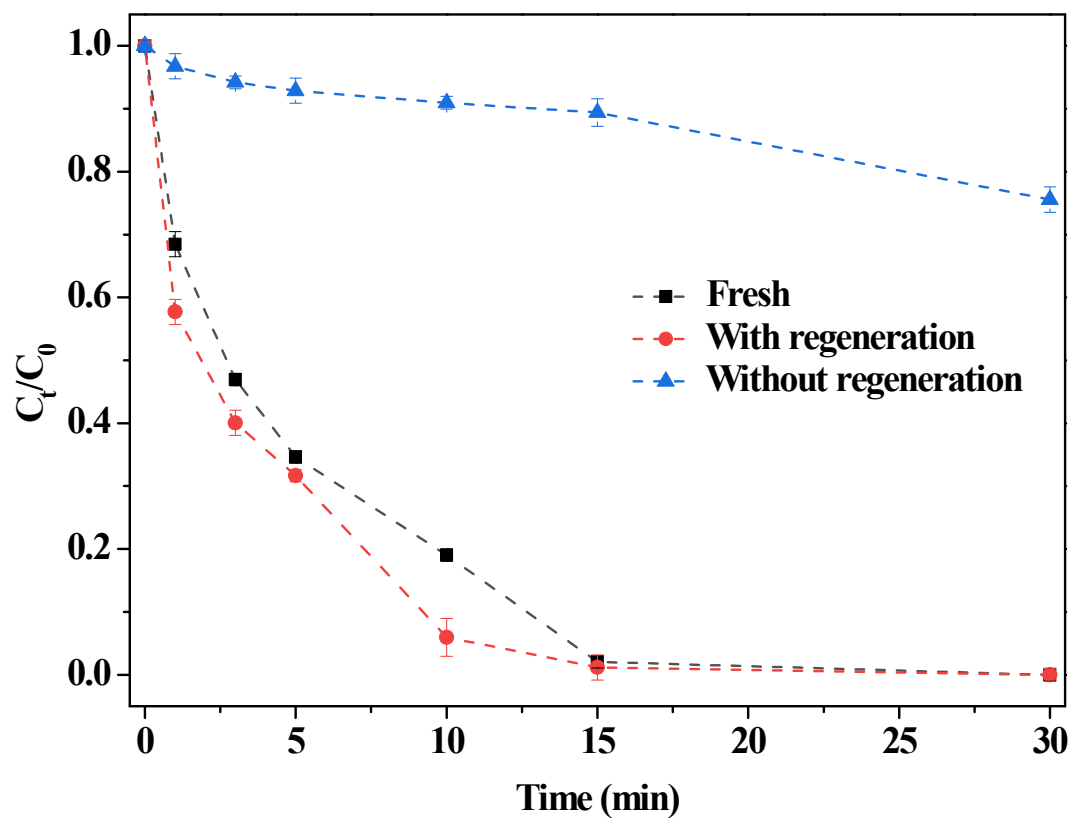

**Figure S13** Comparison of regeneration and without regeneration on the removal of RhB. Reaction conditions: [RhB] = 10 mg/L, initial pH = 3.0, [FeMoS<sub>2</sub>-IS] = 0.3 g/L, [PMS] = 1.0 mM and in the darkness.

**Figure S14**

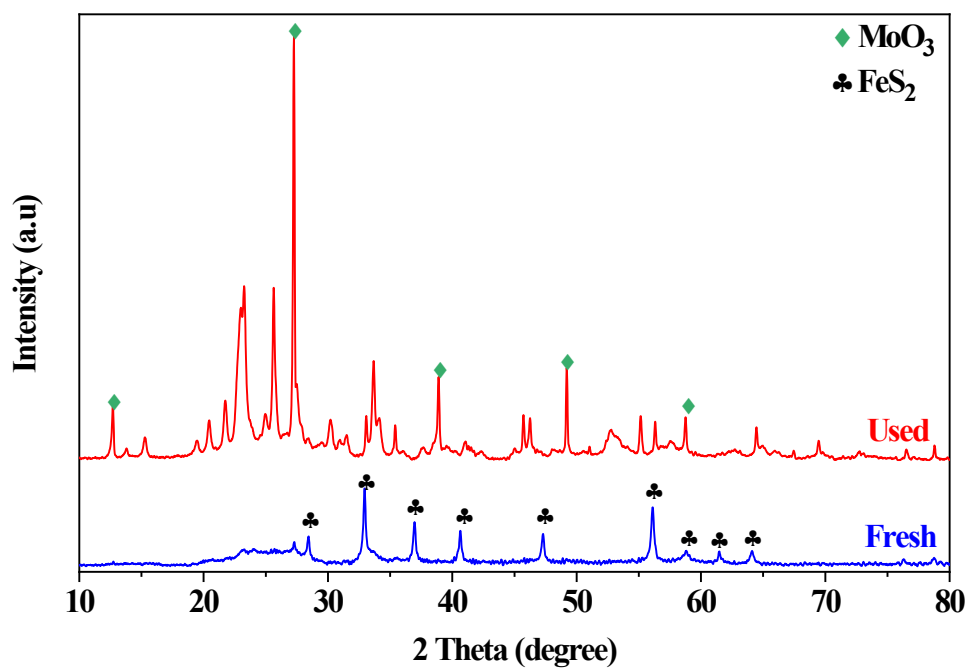

**Figure S14** XRD patterns of fresh and used FeMoS<sub>2</sub>-IS.

Figure S15

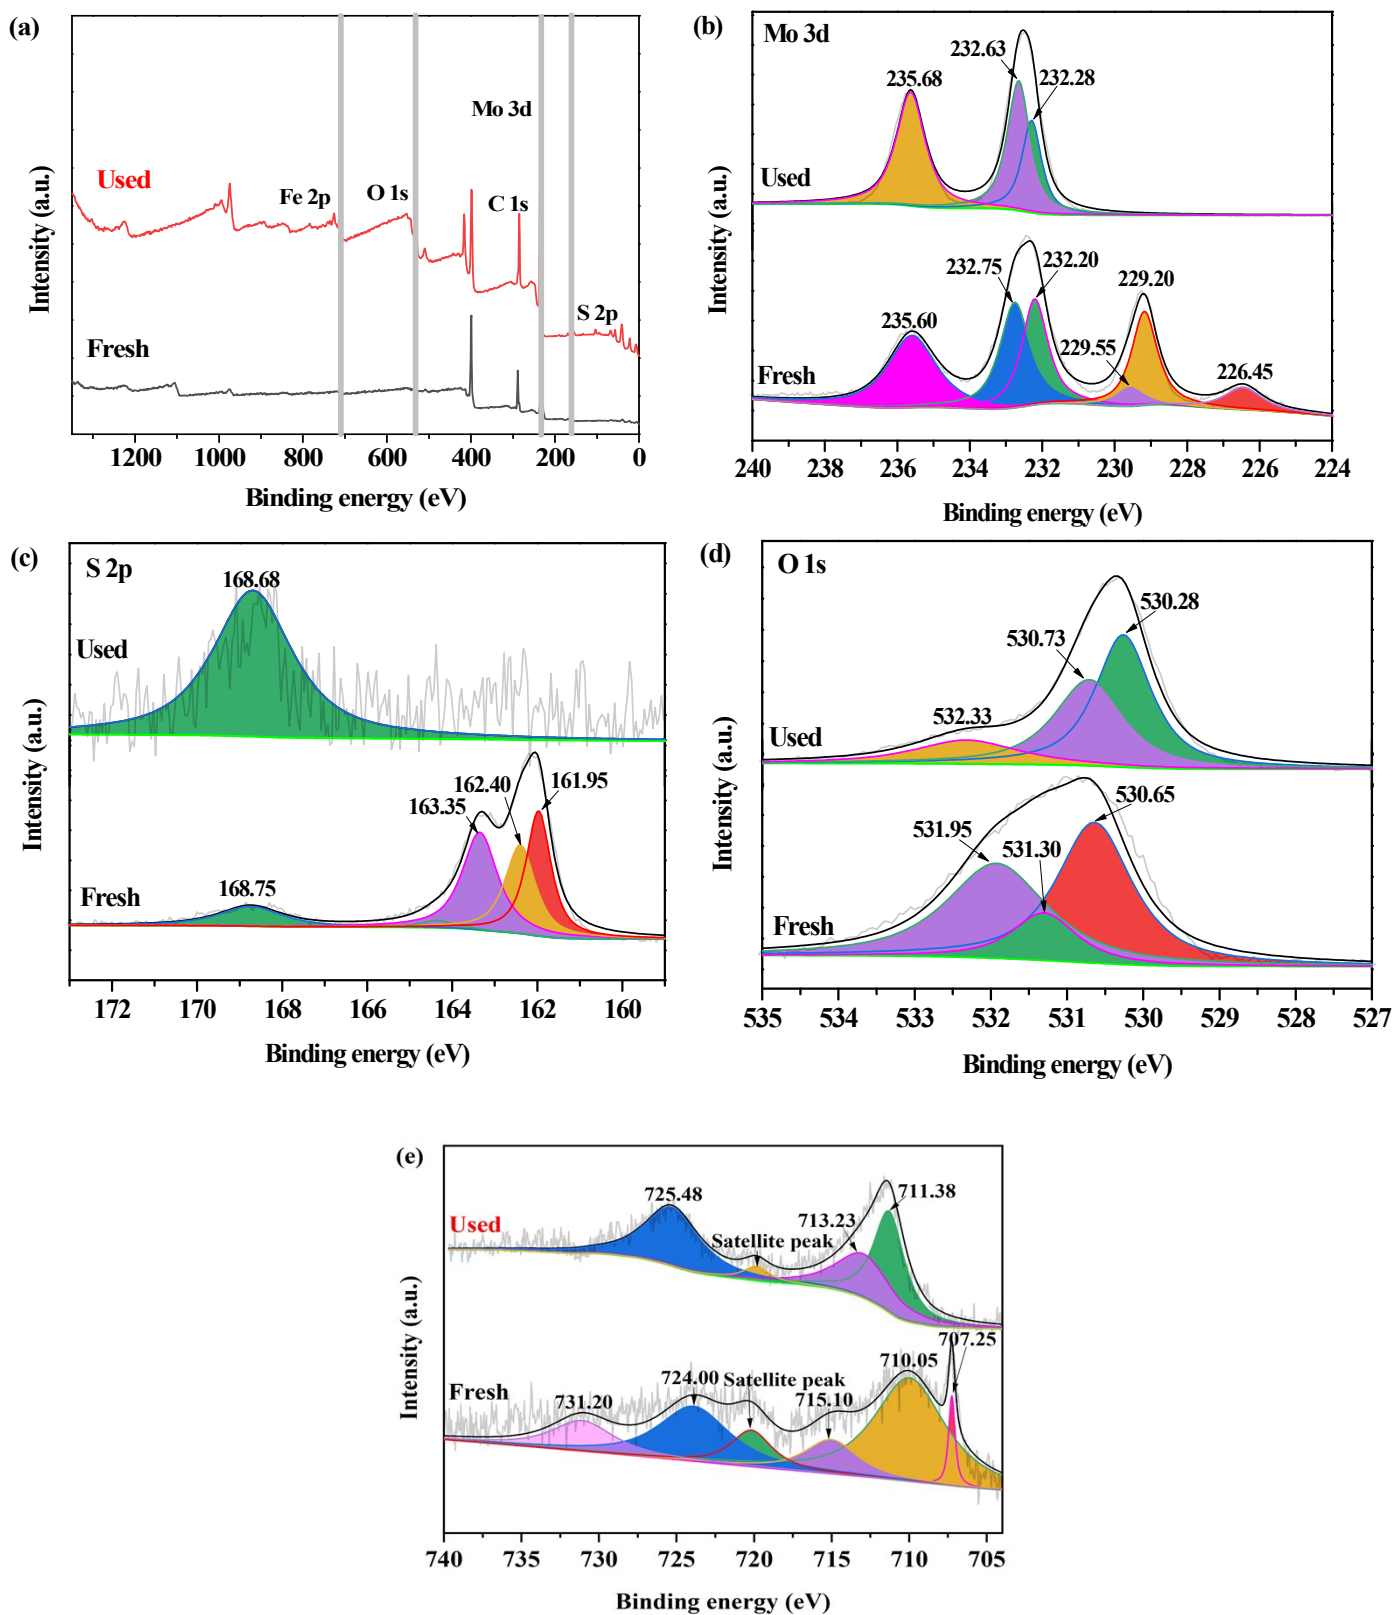

Figure S15 XPS spectra of (a) survey spectra, (b) Mo 3d, (c) S 2p, (d) O 1s and (e) Fe 2p in the fresh and used FeMoS<sub>2</sub>-IS.



Figure S16

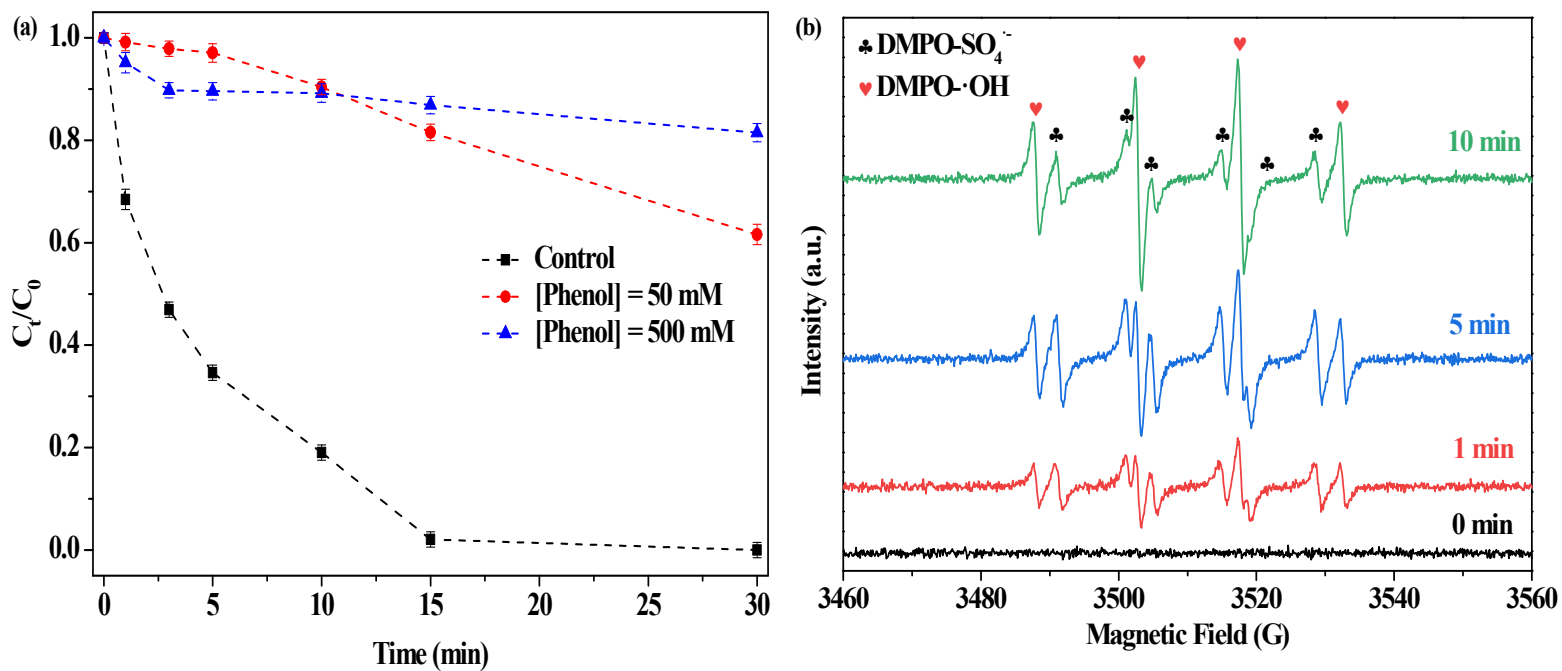

**Figure S16** Effect of phenol (a) on the removal of RhB in the  $\text{FeMoS}_2\text{-IS/PMS}$  process and signals of EPR (b). Reaction conditions:  $[\text{RhB}] = 10 \text{ mg/L}$ , initial  $\text{pH} = 3.0$ ,  $[\text{FeMoS}_2\text{-IS}] = 0.3 \text{ g/L}$ ,  $[\text{PMS}] = 1.0 \text{ mM}$  and in the darkness.

**Table S1** Changes of surface elements from XPS characterization.

| Catalysts                           | Mo <sup>4+</sup> /Mo <sup>6+</sup> | 2H-/1T-<br>MoS <sub>2</sub> | Mo <sup>6+</sup> <sup>a</sup> | Mo-S  | Fe <sup>2+</sup> <sup>b</sup> | Fe <sup>2+</sup> /Fe <sup>3</sup><br>+ |
|-------------------------------------|------------------------------------|-----------------------------|-------------------------------|-------|-------------------------------|----------------------------------------|
| MoS <sub>2</sub> -IS                | 2.23                               | 1.18                        | 0.31                          | 0.031 | No <sup>c</sup>               | No                                     |
| FeMoS <sub>2</sub> -IS              | 2.56                               | 0.74                        | 0.28                          | 0.068 | 0.67                          | 1.99                                   |
| FeMoS <sub>2</sub> -IS-<br>60       | 0.56                               | 0.81                        | 0.36                          | No    | 0.40                          | 0.65                                   |
| FeMoS <sub>2</sub> -IS <sup>d</sup> | 1.46                               | 1.63                        | 0.41                          | No    | 0.38                          | 0.62                                   |

<sup>a</sup>: Mo<sup>6+</sup>/(Mo<sup>4+</sup> + Mo<sup>6+</sup>); <sup>b</sup>: Fe<sup>2+</sup>/(Fe<sup>2+</sup> + Fe<sup>3+</sup>); <sup>c</sup> No wasn't detected; <sup>d</sup>: after five runs. All values were based on the peak of each element from XPS characterization.
